# Supplementary material for: Homogeneous catalysis and heterogeneous separation: Ionic liquids as recyclable photocatalysts for hydroacylation of olefins
Source: Research Square preprint supplement (doi:10.21203/rs.3.rs-4508816/v1), 2024-06-14
Supplement: Supplementary file 1 [file 8769dac807a9a754663cc30c.docx]

**Supporting Information**

Homogeneous catalysis and heterogeneous separation: Ionic liquids as recyclable photocatalysts for hydroacylation of olefins

Hao-Cong Li,1 Ming Zhang,1 Qiyan Lv,*1 Kai Sun,1 Xiao-Lan Chen,*1 Lingbo Qu,1 Bing Yu*1

1 College of Chemistry, School of Life Sciences, Zhengzhou University, Zhengzhou 450001, China.

E-mail: qiyanlv@zzu.edu.cn; chenxl@zzu.edu.cn; bingyu@zzu.edu.cn

**Table of Contents**

[1. General information S2](#_Toc166829878)

[2. Experimental procedures S3](#_Toc166829879)

[3. Mechanistic studies S10](#_Toc166829880)

[4. Characterization data for products S13](#_Toc166829881)

[5. NMR copies of product S23](#_Toc166829882)

[6. References S62](#_Toc166829883)

# General information

All commercial reagents were directly used without further purification. Reactions were monitored by Thin Layer Chromatography (TLC) using UV light (254/365 nm) for detection. Products were purified by column chromatography, which was carried out on 200-300 mesh of silica gel purchased from Qing Dao Hai Yang Chemical Industry Co. All nuclear magnetic resonance (NMR) spectra were recorded on a Bruker Avance 600 MHz, and a Bruker Avance 400 MHz in CDCl3 at room temperature (20 ± 3 °C), by using tetramethylsilane as the internal standard. High-resolution mass spectra (HRMS) were conducted on a 3000-mass spectrometer, using Waters Q-Tof MS/MS system with the ESI technique. A Kessil PR160L-456 nm lamp was placed 3-4 cm away from the reaction vessel for light irradiation.


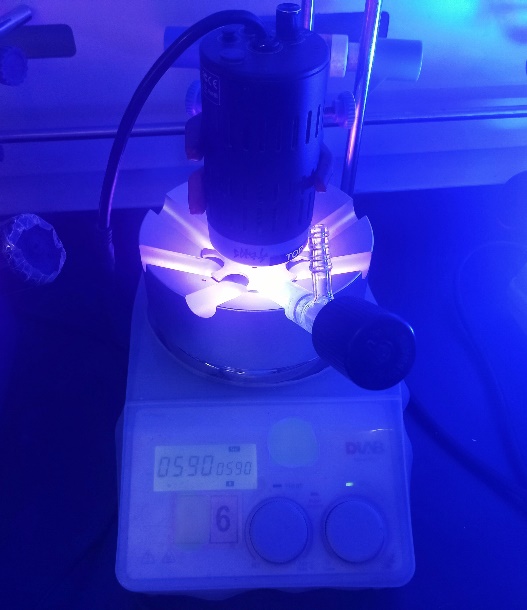


**Figure S1.** The irradiation instrument

# Experimental procedures

**2.1 Optimization of reaction conditions**

Table S1. Optimizations of solvents*a*

|  | | |
| --- | --- | --- |
| Entry | Solvent | Yield (%) |
| 1 | DCM | 78 |
| 2 | DCE | 65 |
| 3 | CH3CN | 23 |
| 4 | EtOAc | 56 |
| 5 | Acetone | 33 |
| 6 | PhCl | 59 |
| 7 | DMF | N.D. |
| 8 | DMSO | N.D. |
| *a*Reaction conditions: **1a** (0.6 mmol), **2a** (0.2 mmol), C4mim-FeCl4 (20 mol%), solvent (2 mL), 40 W Kessil LED lamp (390 nm), under N2. N.D. = not detection. Isolated yields were given. | | |

**Table S2.** Optimizations of ionic liquids*a*

|  | | |
| --- | --- | --- |
| Entry | Ionic Liquid | Yield (%) |
| 1 | IL-1 | 78 |
| 2 | IL-2 | 61 |
| 3 | IL-3 | 47 |
| 4 | IL-4 | 51 |
| 5 | IL-5 | 55 |
| 6 | IL-6 | N.D. |
| 7 | IL-7 | trace |
| 8 | IL-8 | 19 |
| 9 | IL-9 | trace |
| *a*Reaction conditions: **1a** (0.6 mmol), **2a** (0.2 mmol), ionic liquid (20 mol%), DCM (2 mL), 40 W Kessil LED lamp (390 nm), under N2. N.D. = not detection. Isolated yields were given. | | |

**Table S3.** Optimizations of light intensity*a*

|  | | |
| --- | --- | --- |
| Entry | Light intensity | Yield (%) |
| 1 | 10 | 37 |
| 2 | 20 | 58 |
| 3 | 40 | 78 |
| *a*Reaction conditions: **1a** (0.6 mmol), **2a** (0.2 mmol), C4mim-FeCl4 (20 mol%), DCM (2 mL), Kessil LED lamp (390 nm), under N2. Isolated yields were given. | | |

**Table S4.** Optimizations of substrate ratio*a*

|  | | |
| --- | --- | --- |
| Entry | Substrate ratio  (**1a**:**2a**) | Yield (%) |
| 1 | 1:1 | 54 |
| 2 | 2:1 | 61 |
| 3 | 3:1 | 78 |
| 4 | 4:1 | 65 |
| *a*Reaction conditions: the ratio of **1a**:**2a** as shown in Table (0.2 mmol scale), C4mim-FeCl4 (20 mol%), DCM (2 mL), 40 W Kessil LED lamp (390 nm), under N2. Isolated yields were given. | | |

**2.2 Preparation of various ionic liquids**

**2.2.1 Procedure for the synthesis of 1-n-butyl-3-methylimidazolium(benzimidazolium) halide**

According to a modified literature procedure,1 in a 100 ml round-bottom flask, 1-methylimidazole or 1-methylbenzimidazole (50 mmol, 1 equiv) was mixed with n-butyl halide (60 mmol, 1.2 equiv) and allowed to reflux for 24 h at 70 oC. The excess n-butyl halide was distilled off under reduced pressure and the residue was finally extracted thoroughly 2-3 times with diethyl ether to remove the traces of unreacted starting materials. The desired products were obtained.

**2.2.2 Procedure for the synthesis of 1-benzyl-3-methylimidazolium(benzimidazolium) chloride**

According to a modified literature procedure,2 in a 100 ml round-bottom flask, 1-methylimidazole or 1-methylbenzimidazole (50 mmol, 1 equiv) and benzyl chloride (60 mmol, 1.2 equiv) were dissolved in DMF, which was allowed to reflux for 2-3 days at 80 oC. After the reaction, the reaction mixture was filtered, which was washed with diethyl ether. Drying in vacuo for 24 h afforded the corresponding products.

**2.2.3 Procedure for the synthesis of bisimidazolium(benzimidazolium) halide**

According to a modified literature procedure,3 in a 100 mL three-neck flask, 1-methylimidazole or 1-methylbenzimidazole (22 mmol, 2.2 equiv) was mixed with 1,3-dihalopropane (10 mmol, 1 equiv), and allowed to reflux for 16-24 h at 100 oC under an N2 atmosphere. After the reaction, The reaction mixture was cooled, filtered, washed thoroughly with THF and diethyl ether, and dried in vacuo. The target products were obtained as solid.

**2.2.4 Procedure for the synthesis of Fe(III)-based ionic liquids**

According to a modified literature procedure,1,4,5 the various imidazolium(benzimidazolium) halide (5 mmol, 1 equiv) synthesized above and FeCl3 or FeBr3 (5 mmol, 1 equiv) were mixed in a three-neck flask and stirred under N2 atmosphere for 24 h (when bisimidazolium/bisbenzimidazolium halide reacted with FeCl3 or FeBr3, FeCl3 or FeBr3 was 2 equiv). After the reaction, The reaction mixture was dried in vacuo to obtain the products (**IL1**-**IL9**).

**2.3** **General experimental procedures for the desired products 3**

In a 10 mL Schlenk tube, **1** (0.6 mmol, 3 equiv), **2** (0.2 mmol, 1 equiv,), C4mim-FeCl4 (20 mol%) were dissolved in DCM (2 mL), and then charging with nitrogen more than three times. The tube was stirred for 24 h with the irradiation of 40 W purple LED (λ = 390 nm). After the reaction, the mixture was extracted with water and ethyl acetate, and the organic layer was washed with saturated brine and dried over anhydrous Na2SO4. After filtration, the solvent was evaporated in vacuo, and the residue was purified by column chromatography on silica gel to afford the desired products **3**.

**2.4 The** **scale-up synthesis of 3a**


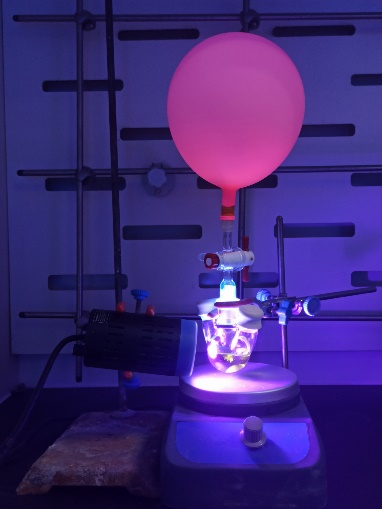


**Figure S2** The reactor for the scale-up synthesis

In a 50 mL three-neck flask, **1a** (6 mmol, 3 equiv), **2a** (2 mmol, 1.0 equiv), and C4mim-FeCl4 (20 mol%) were dissolved in DCM (20 mL), and then the tube was stirred for 24 h with the irradiation of purple LED. After the reaction, the mixture was extracted with water and ethyl acetate, and the organic layer was washed with saturated brine and dried over anhydrous Na2SO4. After filtration, the solvent was evaporated in vacuo, and the residue was purified by column chromatography on silica gel to afford the desired product **3a** in 66% yield (372.2 mg).

**2.5 Synthetic transformations of 3a**

**2.5.1 Synthesis of 6-(p-tolyl)-4,5-dihydropyridazin-3(2H)-one (4)**

In a 10 mL Schlenk tube, **3a** (0.2 mmol, 1 equiv) and hydrazine hydrate (0.8 mmol, 4 equiv) were dissolved in MeOH (2 mL), and then the tube was stirred overnight at 50 oC under N2 atmosphere. After the reaction, the solvent was removed under vacuum, and then the mixture was extracted with water and ethyl acetate, and the organic layer was washed with saturated brine and dried over anhydrous Na2SO4. After filtration, the solvent was evaporated in vacuo, and the residue was purified by column chromatography on silica gel to afford the desired product **4** in 80% yield (30.1 mg).

**2.5.2 Synthesis of 5-(p-tolyl)dihydrofuran-2(3H)-one (5)**

To a flame-dried 50 mL three-neck round bottom flask charged with a magnetic stir bar was added KBH4 (0.6 mmol, 3 equiv). Then, **3a** (0.2 mmol, 1 equiv) dissolved in MeOH (2 mL) was added to the flask and the reaction mixture was stirred at 0 oC for 6 h. After the reaction, the solvent was removed under vacuum, and the residue was purified by column chromatography on silica gel to afford the desired product **5** in 90% yield (31.7 mg).

**2.6 Assessment of the sensitivity of the transformation**

A set of experiments that employed 1a and 2a were performed to evaluate the reaction-condition-based sensitivity of this conversion, which will be valuable in increasing the insight of this new synthetic method and reproducibility. Various parameters including concentration, water level, air atmosphere, reaction time, light intensity, and scale were chosen with positive and negative direction relative to the standard reaction conditions. Each experiment only deliberately changed one parameter, while keeping others at standard levels.

**Table S5.** Assessment of the sensitivity of the transformation*a*

|  | | | | |
| --- | --- | --- | --- | --- |
| Parameter | Variation | | Description | Yield (%)*b* |
| Concentration (*c*) | High *c* | *c* + 10% *c* | 1.8 mL DCM | 66 |
| Low *c* | *c* – 10% *c* | 2.2 mL DCM | 72 |
| H2O level | High H2O | + H2O; VH2O = 1% Vrxn | 20 μL H2O in 2.0 mL DCM | 46 |
| Air atmosphere | Air | Air | Air instead of N2 | 0 |
| Time (h) | Short time | h/2 | 12 h | 61 |
| Long time | 1.5·h | 36 h | 70 |
| Light intensity (*W*) | Low *W* | *W*/16 | 2.5 W | 13 |
| Scale | Big scale | n·10 | 2.0 mmol of **2a** | 66 |
| *a*Reaction conditions: **1a** (0.6 mmol), **2a** (0.2 mmol), C4mim-FeCl4 (20 mol%), DCM (2 mL), 40 W purple Kessil LED lamp (390 nm), under N2 for 24 h. *b*The average yield of three parallel reactions. | | | | |

**2.7 Recycling experiments**

**Figure S3** Recycling experiments

In a 10 mL Schlenk tube, **1a** (0.6 mmol, 3 equiv), **2a** (0.2 mmol, 1 equiv,), C4mim-FeCl4 (20 mol%) were dissolved in DCM (2 mL), and then charging with nitrogen more than three times. The tube was stirred for 24 h with the irradiation of 40 W purple LED (λ = 390 nm). After the reaction, the solvent was removed, washing the residue for five times with 3 mL of ethyl ether each. Then, the C4mim-FeCl4 was dried under vacuum and directly reused for the next cycle without any further purification. The UV Vis of fresh C4mim-FeCl4 and recovered C4mim-FeCl4 are almost the same.

**Figure S4** The UV-Vis of photocatalyst.

**2.8 UV-vis absorbance experiments**

UV-vis absorbance experiments of prepared ionic liquids were tested to confirm the formation of the corresponding ionic liquids as shown in Figure S5.

**Figure S5** UV-vis absorption spectra

UV-vis absorbance tests of Fe(III)Cl4- solution (8*10-5 M) under irradiation for 0 s or 240 s. As shown in Figure S6, we found that Fe(III)Cl4- can also be changed to Fe(II)Cl42- with continuous irradiation at λirr = 390 nm. Fe(III)Cl4- would generate Fe(II)Cl42- and Cl· under light irradiation.

**Figure S6** UV-vis absorption spectra

# Mechanistic studies

**3.1 Control experiments**

In a 10 mL Schlenk tube, **1a** (0.6 mmol, 3 equiv), **2a** (0.2 mmol, 1 equiv), and C4mim-FeCl4 (20 mol%) were dissolved in DCM (2 mL), Afterward, (2,6-ditert-butyl-4-methyl-phenol) (TEMPO, 3 equiv) was added in the mixture, and then charging with nitrogen more than three times. The tube was stirred for 24 h with the irradiation of 40 W purple LED (λ = 390 nm). After the reaction, the yield of **3a** was detected by column chromatography on silica gel.

In a 10 mL Schlenk tube, **1a** (0.6 mmol, 3 equiv), **2a** (0.2 mmol, 1 equiv), and C4mim-FeCl4 (20 mol%) were dissolved in DCM (2 mL), Afterward, (2,6-ditert-butyl-4-methyl-phenol) (BHT, 3 equiv) was added in the mixture, and then charging with nitrogen more than three times. The tube was stirred for 24 h with the irradiation of 40 W purple LED (λ = 390 nm). After the reaction, the yield of **3a** was detected by column chromatography on silica gel.

**3.2 HRMS analysis of model reaction solution**

To understand the reaction mechanism more deeply, we employed high-resolution mass spectrometry (HRMS) to analyze the reaction solution of the model reaction. The m/z 276.1951 obviously corresponds to the molecular ion [C17H26NO2]+ as shown in Figure S7. The m/z 298.1778 obviously corresponds to the molecular ion [C17H25NNaO2]+ as shown in Figure S7. The m/z 361.2134 obviously corresponds to the molecular ion [C23H31NaO2]+ as shown in Figure S8. The m/z 255.1489 obviously corresponds to the molecular ion [C15H24ClO]+ as shown in Figure S9.

**Figure S7.** The HRMS analysis of reaction in the presence of TEMPO

**Figure S8.** The HRMS analysis of reaction in the presence of BHT

**Figure S9.** The HRMS analysis of reaction in the presence of BHT

# Characterization data for products

***benzyl 4-oxo-4-(p-tolyl)butanoate (3a)6***

Purified by flash chromatography (silica gel, petroleum ether/ethyl acetate from 30:1 to 10:1, v/v) to give the desired product: colorless oil (44.0 mg, 78%), 1H NMR (600 MHz, Chloroform-*d*) δ 7.95 – 7.81 (m, 2H), 7.40 – 7.20 (m, 7H), 5.14 (s, 2H), 3.29 (t, *J* = 6.7 Hz, 2H), 2.80 (t, *J* = 6.7 Hz, 2H), 2.39 (s, 3H). 13C NMR (151 MHz, Chloroform-*d*) δ 197.6, 172.8, 144.0, 136.0, 134.1, 129.3, 128.6, 128.19, 128.17, 66.5, 33.3, 28.4, 21.7.

***Benzyl4-(4-isopropylphenyl)-4-oxobutanoate (3b)***

Purified by flash chromatography (silica gel, petroleum ether/ethyl acetate from 30:1 to 10:1, v/v) to give the desired product: colorless oil (36.6 mg, 59%), 1H NMR (600 MHz, Chloroform-*d*) δ 7.94 – 7.89 (m, 2H), 7.37 – 7.33 (m, 4H), 7.33 – 7.29 (m, 3H), 5.14 (s, 2H), 3.31 (t, *J* = 6.7 Hz, 2H), 3.01 – 2.91 (m, 1H), 2.81 (t, *J* = 6.7 Hz, 2H), 1.26 (d, *J* = 6.9 Hz, 6H). 13C NMR (151 MHz, Chloroform-*d*) δ 197.6, 172.8, 154.7, 136.0, 134.5, 128.6, 128.3, 128.2, 126.7, 66.5, 34.3, 33.3, 28.4, 23.7. HRMS (ESI-TOF) *m/z*: [M + Na]+ calcd for C20H22NaO3, 333.1461; found, 333.1468.

***Benzyl4-(4-(tert-butyl)phenyl)-4-oxobutanoate (3c)7***

Purified by flash chromatography (silica gel, petroleum ether/ethyl acetate from 30:1 to 10:1, v/v) to give the desired product: colorless oil (42.1 mg, 65%), 1H NMR (600 MHz, Chloroform-*d*) δ 7.95 – 7.89 (m, 2H), 7.50 – 7.45 (m, 2H), 7.38 – 7.29 (m, 5H), 5.14 (s, 2H), 3.31 (t, *J* = 6.7 Hz, 2H), 2.81 (t, *J* = 6.6 Hz, 2H), 1.34 (s, 9H). 13C NMR (151 MHz, Chloroform-*d*) δ 197.7, 172.8, 157.0, 136.0, 134.0, 128.5, 128.2, 128.0, 125.6, 66.5, 35.1, 33.3, 31.1, 28.4.

***Benzyl4-oxo-4-(4-(phenoxymethyl)phenyl)butanoate (3d)***

Purified by flash chromatography (silica gel, petroleum ether/ethyl acetate from 30:1 to 10:1, v/v) to give the desired product: colorless oil (15.0 mg, 20%), 1H NMR (600 MHz, Chloroform-*d*) δ 7.98 – 7.94 (m, 2H), 7.44 – 7.38 (m, 4H), 7.38 – 7.29 (m, 6H), 7.04 – 6.97 (m, 2H), 5.14 (d, *J* = 9.0 Hz, 4H), 3.28 (t, *J* = 6.7 Hz, 2H), 2.81 (t, *J* = 6.7 Hz, 2H). 13C NMR (151 MHz, Chloroform-*d*) δ 196.5, 172.9, 162.7, 136.2, 136.0, 130.3, 129.9, 128.7, 128.5, 128.3, 128.2, 127.5, 114.6, 70.2, 66.5, 33.0, 28.4. HRMS (ESI-TOF) *m/z*: [M + Na]+ calcd for C24H22NaO4, 397.1410; found, 397.1417.

***Benzyl4-(4-acetoxyphenyl)-4-oxobutanoate (3e)***

Purified by flash chromatography (silica gel, petroleum ether/ethyl acetate from 20:1 to 5:1, v/v) to give the desired product: colorless oil (46.9 mg, 72%), 1H NMR (600 MHz, Chloroform-*d*) δ 8.03 – 7.98 (m, 2H), 7.37 – 7.29 (m, 5H), 7.21 – 7.16 (m, 2H), 5.14 (s, 2H), 3.30 (t, *J* = 6.6 Hz, 2H), 2.81 (t, *J* = 6.6 Hz, 2H), 2.31 (s, 3H). 13C NMR (151 MHz, Chloroform-*d*) δ 196.8, 172.7, 168.8, 154.5, 135.9, 134.1, 129.7, 128.6, 128.23, 128.20, 121.8, 66.5, 33.3, 28.3, 21.1. HRMS (ESI-TOF) *m/z*: [M + Na]+ calcd for C19H18NaO5, 349.1046; found, 349.1051.

***Benzyl4-(4-fluorophenyl)-4-oxobutanoate (3f)***

Purified by flash chromatography (silica gel, petroleum ether/ethyl acetate from 30:1 to 10:1, v/v) to give the desired product: colorless oil (48.1 mg, 84%), 1H NMR (600 MHz, Chloroform-*d*) δ 8.03 – 7.96 (m, 2H), 7.38 – 7.29 (m, 5H), 7.15 – 7.07 (m, 2H), 5.14 (s, 2H), 3.28 (t, *J* = 6.6 Hz, 2H), 2.81 (t, *J* = 6.6 Hz, 2H). 13C NMR (151 MHz, Chloroform-*d*) δ 196.4, 172.7, 165.8 (d, *J* = 254.8 Hz), 135.9, 133.0 (d, *J* = 2.9 Hz), 130.72, 130.66, 128.6, 128.24, 128.21, 115.7 (d, *J* = 21.8 Hz), 66.5, 33.2, 28.3. 19F NMR (565 MHz, Chloroform-*d*) δ -104.98. HRMS (ESI-TOF) *m/z*: [M + Na]+ calcd for C17H15FNaO3, 309.0897; found, 309.0899.

***Benzyl4-(4-chlorophenyl)-4-oxobutanoate (3g)***

Purified by flash chromatography (silica gel, petroleum ether/ethyl acetate from 30:1 to 10:1, v/v) to give the desired product: colorless oil (55.6 mg, 92%), 1H NMR (600 MHz, Chloroform-*d*) δ 7.93 – 7.89 (m, 2H), 7.45 – 7.41 (m, 2H), 7.38 – 7.29 (m, 5H), 5.14 (s, 2H), 3.28 (t, *J* = 6.6 Hz, 2H), 2.82 (t, *J* = 6.6 Hz, 2H). 13C NMR (151 MHz, Chloroform-*d*) δ 196.8, 172.6, 139.7, 135.8, 134.9, 129.5, 128.9, 128.6, 128.3, 128.2, 66.6, 33.3, 28.2. HRMS (ESI-TOF) *m/z*: [M + Na]+ calcd for C17H15ClNaO3, 325.0602; found, 325.0602.

***Benzyl4-(4-bromophenyl)-4-oxobutanoate (3h)***

Purified by flash chromatography (silica gel, petroleum ether/ethyl acetate from 30:1 to 10:1, v/v) to give the desired product: colorless oil (39.5 mg, 57%), 1H NMR (400 MHz, Chloroform-*d*) δ 7.87 – 7.81 (m, 2H), 7.64 – 7.58 (m, 2H), 7.38 – 7.32 (m, 5H), 5.15 (s, 2H), 3.29 (t, *J* = 6.6 Hz, 2H), 2.82 (t, *J* = 6.5 Hz, 2H). 13C NMR (151 MHz, Chloroform-*d*) δ 197.0, 172.6, 135.8, 135.3, 132.0, 129.6, 128.6, 128.4, 128.3, 128.2, 66.6, 33.3, 28.2. HRMS (ESI-TOF) *m/z*: [M + Na]+ calcd for C17H15BrNaO3, 369.0097; found, 369.0095.

***Benzyl4-oxo-4-(4-(trifluoromethyl)phenyl)butanoate (3i)***

Purified by flash chromatography (silica gel, petroleum ether/ethyl acetate from 30:1 to 10:1, v/v) to give the desired product: colorless oil (53.1 mg, 79%), 1H NMR (600 MHz, Chloroform-*d*) δ 8.09 – 8.03 (m, 2H), 7.75 – 7.69 (m, 2H), 7.38 – 7.29 (m, 5H), 5.15 (s, 2H), 3.33 (t, *J* = 6.5 Hz, 2H), 2.84 (t, *J* = 6.5 Hz, 2H). 13C NMR (151 MHz, Chloroform-*d*) δ 197.1, 172.5, 139.2, 135.8, 134.5 (q, *J* = 32.8 Hz), 128.6, 128.4, 128.3, 128.2, 125.7 (q, *J* = 3.7 Hz), 123.6 (q, *J* = 272.7 Hz), 66.6, 33.6, 28.2. 19F NMR (565 MHz, Chloroform-*d*) δ -63.13. HRMS (ESI-TOF) *m/z*: [M + Na]+ calcd for C18H15F3NaO3, 359.0866; found, 359.0865.

***Benzyl4-(4-cyanophenyl)-4-oxobutanoate (3j)***

Purified by flash chromatography (silica gel, petroleum ether/ethyl acetate from 20:1 to 7:1, v/v) to give the desired product: colorless oil (42.8 mg, 73%), 1H NMR (600 MHz, Chloroform-*d*) δ 8.08 – 8.02 (m, 2H), 7.78 – 7.73 (m, 2H), 7.39 – 7.30 (m, 5H), 5.14 (s, 2H), 3.31 (t, *J* = 6.5 Hz, 2H), 2.84 (t, *J* = 6.4 Hz, 2H). 13C NMR (151 MHz, Chloroform-*d*) δ 196.8, 172.4, 139.5, 135.7, 132.5, 128.6, 128.5, 128.3, 128.2, 117.9, 116.5, 66.7, 33.6, 28.1. HRMS (ESI-TOF) *m/z*: [M + Na]+ calcd for C18H15NNaO3, 316.0944; found, 316.0944.

***Benzyl4-oxo-4-phenylbutanoate (3k)8***

Purified by flash chromatography (silica gel, petroleum ether/ethyl acetate from 30:1 to 10:1, v/v) to give the desired product: colorless oil (46.7 mg, 87%), 1H NMR (600 MHz, Chloroform-*d*) δ 8.00 – 7.95 (m, 2H), 7.58 – 7.53 (m, 1H), 7.48 – 7.42 (m, 2H), 7.37 – 7.28 (m, 5H), 5.14 (s, 2H), 3.32 (t, *J* = 6.6 Hz, 2H), 2.82 (t, *J* = 6.6 Hz, 2H). 13C NMR (151 MHz, Chloroform-*d*) δ 198.0, 172.7, 136.6, 135.9, 133.2, 128.64, 128.57, 128.22, 128.21, 128.1, 66.5, 33.4, 28.3.

***Benzyl4-oxo-4-(o-tolyl)butanoate (3l)***

Purified by flash chromatography (silica gel, petroleum ether/ethyl acetate from 30:1 to 10:1, v/v) to give the desired product: colorless oil (26.5 mg, 47%), 1H NMR (600 MHz, Chloroform-*d*) δ 7.71 – 7.66 (m, 1H), 7.39 – 7.33 (m, 5H), 7.34 – 7.29 (m, 1H), 7.27 – 7.21 (m, 2H), 5.14 (s, 2H), 3.22 (t, *J* = 6.5 Hz, 2H), 2.80 (t, *J* = 6.5 Hz, 2H), 2.48 (s, 3H). 13C NMR (151 MHz, Chloroform-*d*) δ 201.9, 172.7, 138.2, 137.5, 135.9, 132.0, 131.4, 128.6, 128.5, 128.2, 125.7, 66.5, 36.1, 28.5, 21.3. HRMS (ESI-TOF) *m/z*: [M + Na]+ calcd for C18H18NaO3, 305.1148; found, 305.1151.

***Benzyl4-(2-methoxyphenyl)-4-oxobutanoate (3m)***

Purified by flash chromatography (silica gel, petroleum ether/ethyl acetate from 30:1 to 10:1, v/v) to give the desired product: colorless oil (26.2 mg, 44%), 1H NMR (600 MHz, Chloroform-*d*) δ 7.77 – 7.71 (m, 1H), 7.50 – 7.44 (m, 1H), 7.38 – 7.28 (m, 5H), 7.03 – 6.93 (m, 2H), 5.14 (s, 2H), 3.89 (s, 3H), 3.34 (t, *J* = 6.7 Hz, 2H), 2.77 (t, *J* = 6.7 Hz, 2H). 13C NMR (151 MHz, Chloroform-*d*) δ 199.8, 173.0, 158.9, 136.1, 133.7, 130.5, 128.5, 128.1, 120.7, 111.6, 66.3, 55.5, 38.7, 28.8. HRMS (ESI-TOF) *m/z*: [M + Na]+ calcd for C18H18NaO4, 321.1097; found, 321.1101.

***Benzyl4-(2-cyanophenyl)-4-oxobutanoate (3n)***

Purified by flash chromatography (silica gel, petroleum ether/ethyl acetate from 10:1 to 3:1, v/v) to give the desired product: colorless oil (44.5 mg, 76%), 1H NMR (600 MHz, Chloroform-*d*) δ 7.99 (dd, *J* = 7.8, 1.2 Hz, 1H), 7.81 (dd, *J* = 7.6, 1.3 Hz, 1H), 7.72 – 7.68 (m, 1H), 7.67 – 7.63 (m, 1H), 7.38 – 7.29 (m, 5H), 5.14 (s, 2H), 3.34 (t, *J* = 6.4 Hz, 2H), 2.88 (t, *J* = 6.4 Hz, 2H). 13C NMR (151 MHz, Chloroform-*d*) δ 196.6, 172.3, 139.3, 135.7, 135.3, 132.7, 132.59, 132.57, 129.5, 128.6, 128.3, 128.2, 118.0, 111.0, 66.7, 34.5, 28.2. HRMS (ESI-TOF) *m/z*: [M + Na]+ calcd for C18H15NNaO3, 316.0944; found, 316.0946.

***Benzyl4-oxo-4-(m-tolyl)butanoate (3o)***

Purified by flash chromatography (silica gel, petroleum ether/ethyl acetate from 30:1 to 10:1, v/v) to give the desired product: colorless oil (36.7 mg, 65%), 1H NMR (600 MHz, Chloroform-*d*) δ 7.81 – 7.74 (m, 2H), 7.40 – 7.27 (m, 7H), 5.14 (s, 2H), 3.31 (t, *J* = 6.7 Hz, 2H), 2.81 (t, *J* = 6.6 Hz, 2H), 2.40 (s, 3H). 13C NMR (151 MHz, Chloroform-*d*) δ 198.2, 172.8, 138.4, 136.6, 136.0, 134.0, 128.59, 128.56, 128.5, 128.2, 125.3, 66.5, 33.4, 28.3, 21.4. HRMS (ESI-TOF) *m/z*: [M + Na]+ calcd for C18H18NaO3, 305.1148; found, 305.1151.

***Benzyl4-(3-chlorophenyl)-4-oxobutanoate (3p)***

Purified by flash chromatography (silica gel, petroleum ether/ethyl acetate from 30:1 to 10:1, v/v) to give the desired product: colorless oil (42.9 mg, 71%), 1H NMR (600 MHz, Chloroform-*d*) δ 7.96 – 7.91 (m, 1H), 7.86 – 7.81 (m, 1H), 7.55 – 7.50 (m, 1H), 7.42 – 7.29 (m, 6H), 5.14 (s, 2H), 3.28 (t, *J* = 6.5 Hz, 2H), 2.82 (t, *J* = 6.5 Hz, 2H). 13C NMR (151 MHz, Chloroform-*d*) δ 196.8, 172.5, 138.1, 135.8, 135.0, 133.2, 130.0, 128.6, 128.3, 128.22, 128.19, 126.1, 66.6, 33.5, 28.2. HRMS (ESI-TOF) *m/z*: [M + Na]+ calcd for C17H15ClNaO3, 325.0602; found, 325.0601.

***Benzyl4-(3-cyanophenyl)-4-oxobutanoate (3q)***

Purified by flash chromatography (silica gel, petroleum ether/ethyl acetate from 15:1 to 7:1, v/v) to give the desired product: colorless oil (46.3 mg, 79%), 1H NMR (600 MHz, Chloroform-*d*) δ 8.24 (s, 1H), 8.20 – 8.16 (m, 1H), 7.86 – 7.80 (m, 1H), 7.63 – 7.57 (m, 1H), 7.39 – 7.30 (m, 5H), 5.14 (s, 2H), 3.30 (t, *J* = 6.4 Hz, 2H), 2.85 (t, *J* = 6.4 Hz, 2H). 13C NMR (151 MHz, Chloroform-*d*) δ 196.1, 172.3, 137.3, 136.1, 135.7, 132.0, 131.8, 129.7, 128.6, 128.3, 128.2, 117.9, 113.2, 66.7, 33.4, 28.1. HRMS (ESI-TOF) *m/z*: [M + Na]+ calcd for C18H15NNaO3, 316.0944; found, 316.0944.

***Benzyl4-oxo-4-(thiophen-2-yl)butanoate (3r)***

Purified by flash chromatography (silica gel, petroleum ether/ethyl acetate from 30:1 to 10:1, v/v) to give the desired product: colorless oil (20.8 mg, 38%), 1H NMR (600 MHz, Chloroform-*d*) δ 7.77 – 7.73 (m, 1H), 7.66 – 7.62 (m, 1H), 7.39 – 7.30 (m, 5H), 7.16 – 7.08 (m, 1H), 5.14 (s, 2H), 3.27 (t, *J* = 6.7 Hz, 2H), 2.82 (t, *J* = 6.7 Hz, 2H). 13C NMR (151 MHz, Chloroform-*d*) δ 190.9, 172.5, 143.7, 135.8, 133.7, 132.0, 128.6, 128.23, 128.20, 128.1, 66.6, 33.9, 28.3. HRMS (ESI-TOF) *m/z*: [M + Na]+ calcd for C15H14NaO3S, 297.0556; found, 297.0555.

***Benzyl4-(naphthalen-2-yl)-4-oxobutanoate (3s)***

Purified by flash chromatography (silica gel, petroleum ether/ethyl acetate from 30:1 to 10:1, v/v) to give the desired product: colorless oil (32.4 mg, 51%), 1H NMR (600 MHz, Chloroform-*d*) δ 8.49 (s, 1H), 8.06 – 8.00 (m, 1H), 7.94 (d, *J* = 8.2 Hz, 1H), 7.90 – 7.84 (m, 2H), 7.62 – 7.51 (m, 2H), 7.39 – 7.28 (m, 5H), 5.16 (s, 2H), 3.46 (t, *J* = 6.7 Hz, 2H), 2.88 (t, *J* = 6.7 Hz, 2H). 13C NMR (151 MHz, Chloroform-*d*) δ 197.9, 172.8, 135.9, 135.7, 133.9, 132.5, 129.8, 129.6, 128.6, 128.52, 128.49, 128.2, 127.8, 126.8, 123.8, 66.6, 33.5, 28.4. HRMS (ESI-TOF) *m/z*: [M + Na]+ calcd for C21H18NaO3, 341.1148; found, 341.1148.

***Benzyl4-oxo-6-phenylhexanoate (3t)9***

Purified by flash chromatography (silica gel, petroleum ether/ethyl acetate from 30:1 to 10:1, v/v) to give the desired product: colorless oil (24.3 mg, 41%), 1H NMR (600 MHz, Chloroform-*d*) δ 7.39 – 7.30 (m, 5H), 7.29 – 7.24 (m, 2H), 7.20 – 7.14 (m, 3H), 5.11 (s, 2H), 2.90 (t, *J* = 7.7 Hz, 2H), 2.80 – 2.75 (m, 2H), 2.71 (t, *J* = 6.4 Hz, 2H), 2.66 – 2.62 (m, 2H). 13C NMR (151 MHz, Chloroform-*d*) δ 207.8, 172.6, 140.9, 135.8, 128.6, 128.5, 128.30, 128.26, 128.2, 126.1, 66.5, 44.3, 37.2, 29.7, 28.0.

***Benzyl4-oxoheptanoate (3u)9***

Purified by flash chromatography (silica gel, petroleum ether/ethyl acetate from 30:1 to 10:1, v/v) to give the desired product: colorless oil (20.1 mg, 43%), 1H NMR (600 MHz, Chloroform-*d*) δ 7.41 – 7.29 (m, 5H), 5.11 (s, 2H), 2.73 (t, *J* = 6.5 Hz, 2H), 2.64 (t, *J* = 6.7 Hz, 2H), 2.42 (t, *J* = 7.4 Hz, 2H), 1.66 – 1.56 (m, 2H), 0.91 (t, *J* = 7.4 Hz, 3H). 13C NMR (151 MHz, Chloroform-*d*) δ 208.9, 172.7, 135.9, 128.5, 128.22, 128.19, 66.5, 44.7, 37.0, 28.0, 17.3, 13.7.

***Benzyl5-methyl-4-oxoheptanoate (3v)***

Purified by flash chromatography (silica gel, petroleum ether/ethyl acetate from 30:1 to 10:1, v/v) to give the desired product: colorless oil (21.3 mg, 43%), 1H NMR (600 MHz, Chloroform-*d*) δ 7.38 – 7.30 (m, 5H), 5.11 (s, 2H), 2.83 – 2.71 (m, 2H), 2.64 (t, *J* = 6.6 Hz, 2H), 2.52 – 2.44 (m, 1H), 1.72 – 1.66 (m, 1H), 1.44 – 1.35 (m, 1H), 1.08 (d, *J* = 7.0 Hz, 3H), 0.87 (t, *J* = 7.4 Hz, 3H). 13C NMR (151 MHz, Chloroform-*d*) δ 211.9, 172.8, 135.9, 128.5, 128.2, 66.4, 50.7, 35.0, 28.5, 28.0, 25.8, 25.6. HRMS (ESI-TOF) *m/z*: [M + Na]+ calcd for C15H20NaO3, 271.1305; found, 271.1307.

***Benzyl4-cyclopropyl-4-oxobutanoate (3w)***

Purified by flash chromatography (silica gel, petroleum ether/ethyl acetate from 30:1 to 10:1, v/v) to give the desired product: colorless oil (24.1 mg, 52%), 1H NMR (600 MHz, Chloroform-*d*) δ 7.38 – 7.29 (m, 5H), 5.12 (s, 2H), 2.91 (t, *J* = 6.7 Hz, 2H), 2.65 (t, *J* = 6.7 Hz, 2H), 1.99 – 1.89 (m, 1H), 1.06 – 1.01 (m, 2H), 0.91 – 0.84 (m, 2H). 13C NMR (151 MHz, Chloroform-*d*) δ 208.6, 172.6, 135.9, 128.5, 128.20, 128.18, 66.4, 37.6, 28.1, 20.5, 10.8. HRMS (ESI-TOF) *m/z*: [M + H]+ calcd for C14H17O3, 233.1172; found, 233.1150.

***Benzyl4-cyclohexyl-4-oxobutanoate (3x)9***

Purified by flash chromatography (silica gel, petroleum ether/ethyl acetate from 30:1 to 10:1, v/v) to give the desired product: colorless oil (22.5 mg, 41%), 1H NMR (600 MHz, Chloroform-*d*) δ 7.40 – 7.28 (m, 5H), 5.11 (s, 2H), 2.76 (t, *J* = 6.5 Hz, 2H), 2.63 (t, *J* = 6.5 Hz, 2H), 2.40 – 2.32 (m, 1H), 1.89 – 1.82 (m, 2H), 1.80 – 1.73 (m, 2H), 1.70 – 1.63 (m, 1H), 1.39 – 1.18 (m, 5H). 13C NMR (151 MHz, Chloroform-*d*) δ 212.5, 172.7, 135.9, 128.5, 128.2, 66.4, 47.8, 35.6, 27.9, 26.0, 15.8, 11.6.

***Phenyl4-oxo-4-(p-tolyl)butanoate (3y)6***

Purified by flash chromatography (silica gel, petroleum ether/ethyl acetate from 30:1 to 10:1, v/v) to give the desired product: colorless oil (47.7 mg, 89%), 1H NMR (600 MHz, Chloroform-*d*) δ 7.90 (d, *J* = 8.0 Hz, 2H), 7.40 – 7.34 (m, 2H), 7.29 – 7.24 (m, 2H), 7.23 – 7.19 (m, 1H), 7.14 – 7.09 (m, 2H), 3.39 (t, *J* = 6.6 Hz, 2H), 2.99 (t, *J* = 6.5 Hz, 2H), 2.40 (s, 3H). 13C NMR (151 MHz, Chloroform-*d*) δ 197.5, 171.6, 150.8, 144.1, 134.0, 129.4, 129.3, 128.2, 125.8, 121.6, 33.3, 28.5, 21.7.

***Ethyl4-oxo-4-(p-tolyl)butanoate (3z)6***

Purified by flash chromatography (silica gel, petroleum ether/ethyl acetate from 30:1 to 10:1, v/v) to give the desired product: colorless oil (33.0 mg, 75%), 1H NMR (600 MHz, Chloroform-*d*) δ 7.88 (d, *J* = 8.0 Hz, 2H), 7.26 (d, *J* = 7.9 Hz, 2H), 4.16 (q, *J* = 7.1 Hz, 2H), 3.29 (t, *J* = 6.7 Hz, 2H), 2.74 (t, *J* = 6.7 Hz, 2H), 2.41 (s, 3H), 1.26 (t, *J* = 7.2 Hz, 3H). 13C NMR (151 MHz, Chloroform-*d*) δ 197.7, 173.0, 144.0, 134.1, 129.3, 128.1, 60.6, 33.3, 28.4, 21.6, 14.2.

***Ethyl4-oxo-2-phenyl-4-(p-tolyl)butanoate (3aa)10***

Purified by flash chromatography (silica gel, petroleum ether/ethyl acetate from 30:1 to 10:1, v/v) to give the desired product: colorless oil (22.5 mg, 38%), 1H NMR (600 MHz, Chloroform-*d*) δ 7.87 (d, *J* = 8.0 Hz, 2H), 7.38 – 7.32 (m, 4H), 7.30 – 7.26 (m, 1H), 7.25 – 7.22 (m, 2H), 4.30 – 4.25 (m, 1H), 4.23 – 4.16 (m, 1H), 4.16 – 4.06 (m, 1H), 3.95 – 3.87 (m, 1H), 3.28 – 3.20 (m, 1H), 2.40 (s, 3H), 1.21 (t, *J* = 7.1 Hz, 3H). 13C NMR (151 MHz, Chloroform-*d*) δ 197.3, 173.4, 144.1, 138.6, 134.0, 129.3, 128.8, 128.2, 127.8, 127.4, 61.1, 46.6, 42.7, 21.7, 14.1.

***2,2,2-trifluoroethyl2-methyl-4-oxo-4-(p-tolyl)butanoate (3ab)***

Purified by flash chromatography (silica gel, petroleum ether/ethyl acetate from 30:1 to 10:1, v/v) to give the desired product: colorless oil (39.2 mg, 68%), 1H NMR (600 MHz, Chloroform-*d*) δ 7.86 (d, *J* = 8.2 Hz, 2H), 7.26 (d, *J* = 8.0 Hz, 2H), 4.63 – 4.52 (m, 1H), 4.48 – 4.37 (m, 1H), 3.46 (dd, *J* = 17.8, 8.2 Hz, 1H), 3.26 – 3.15 (m, 1H), 3.09 (dd, *J* = 17.7, 5.2 Hz, 1H), 2.41 (s, 3H), 1.32 (d, *J* = 7.2 Hz, 3H). 13C NMR (151 MHz, Chloroform-*d*) δ 197.1, 174.5, 144.2, 134.0, 129.3, 128.1, 123.0 (q, *J* = 277.2 Hz), 60.4 (q, *J* = 36.5 Hz), 41.6, 34.7, 21.6, 17.0. 19F NMR (565 MHz, Chloroform-*d*) δ -73.86. HRMS (ESI-TOF) *m/z*: [M + Na]+ calcd for C14H15F3NaO3, 311.0866; found, 311.0864.

***1-ethyl-3-(4-methylbenzoyl)pyrrolidine-2,5-dione (3ac)***

Purified by flash chromatography (silica gel, petroleum ether/ethyl acetate from 20:1 to 5:1, v/v) to give the desired product: colorless oil (29.4 mg, 60%), 1H NMR (600 MHz, Chloroform-*d*) δ 8.01 (d, *J* = 8.1 Hz, 2H), 7.33 (d, *J* = 8.0 Hz, 2H), 4.81 (dd, *J* = 8.9, 4.0 Hz, 1H), 3.56 (q, *J* = 7.2 Hz, 2H), 3.36 (dd, *J* = 18.1, 3.9 Hz, 1H), 2.83 (dd, *J* = 18.1, 8.9 Hz, 1H), 2.45 (s, 3H), 1.16 (t, *J* = 7.2 Hz, 3H). 13C NMR (151 MHz, Chloroform-*d*) δ 192.0, 175.7, 172.8, 145.5, 133.0, 129.9, 129.5, 48.3, 34.3, 31.7, 21.8, 12.9. HRMS (ESI-TOF) *m/z*: [M + Na]+ calcd for C14H15NNaO3, 268.0944; found, 268.0952.

***3-(4-methylbenzoyl)cyclohexan-1-one (3ad)6***

Purified by flash chromatography (silica gel, petroleum ether/ethyl acetate from 30:1 to 10:1, v/v) to give the desired product: colorless oil (32.9 mg, 76%), 1H NMR (600 MHz, Chloroform-*d*) δ 7.85 (d, *J* = 8.1 Hz, 2H), 7.28 (d, *J* = 8.0 Hz, 2H), 3.85 – 3.73 (m, 1H), 2.77 – 2.67 (m, 1H), 2.49 – 2.45 (m, 1H), 2.45 – 2.38 (m, 5H), 2.15 – 2.05 (m, 2H), 1.90 – 1.79 (m, 2H). 13C NMR (151 MHz, Chloroform-*d*) δ 210.4, 200.0, 144.4, 132.8, 129.5, 128.5, 45.1, 43.2, 41.0, 28.5, 24.9, 21.7.

***4-oxo-4-(p-tolyl)butanenitrile (3ae)6***

Purified by flash chromatography (silica gel, petroleum ether/ethyl acetate from 30:1 to 10:1, v/v) to give the desired product: colorless oil (7.3 mg, 21%), 1H NMR (600 MHz, Chloroform-*d*) δ 7.85 (d, *J* = 8.0 Hz, 2H), 7.29 (d, *J* = 7.9 Hz, 2H), 3.36 (t, *J* = 7.3 Hz, 2H), 2.77 (t, *J* = 7.3 Hz, 2H), 2.43 (s, 3H). 13C NMR (151 MHz, Chloroform-*d*) δ 194.9, 144.9, 133.2, 129.5, 128.1, 119.3, 34.1, 21.7, 11.8.

***2-benzyl-2-(4-methylbenzoyl)malononitrile (3af)***

Purified by flash chromatography (silica gel, petroleum ether/ethyl acetate from 20:1 to 5:1, v/v) to give the desired product: colorless oil (38.9 mg, 71%), 1H NMR (600 MHz, Chloroform-*d*) δ 7.79 (d, *J* = 8.1 Hz, 2H), 7.41 – 7.38 (m, 2H), 7.38 – 7.33 (m, 3H), 7.19 (d, *J* = 8.1 Hz, 2H), 5.09 (d, *J* = 8.3 Hz, 1H), 4.53 (d, *J* = 8.3 Hz, 1H), 2.35 (s, 3H). 13C NMR (151 MHz, Chloroform-*d*) δ 192.6, 145.7, 132.3, 131.4, 130.0, 129.8, 129.7, 129.4, 128.6, 112.2, 111.7, 54.7, 26.8, 21.8. HRMS (ESI-TOF) *m/z*: [M + Na]+ calcd for C18H14N2NaO, 297.0998; found, 297.0998.

***3-(phenylsulfonyl)-1-(p-tolyl)propan-1-one (3ag)6***

Purified by flash chromatography (silica gel, petroleum ether/ethyl acetate from 30:1 to 10:1, v/v) to give the desired product: colorless oil (16.1 mg, 28%), 1H NMR (600 MHz, Chloroform-*d*) δ 7.98 – 7.93 (m, 2H), 7.84 – 7.79 (m, 2H), 7.70 – 7.65 (m, 1H), 7.61 – 7.56 (m, 2H), 7.29 – 7.24 (m, 2H), 3.59 – 3.53 (m, 2H), 3.50 – 3.44 (m, 2H), 2.41 (s, 3H). 13C NMR (151 MHz, Chloroform-*d*) δ 195.0, 144.8, 139.1, 133.9, 133.4, 129.5, 129.4, 128.2, 128.0, 51.1, 31.2, 21.7.

***Ethyl-2-(((4-chlorophenyl)sulfonyl)methyl)-4-oxo-4-(p-tolyl)butanoate (3ah)***

Purified by flash chromatography (silica gel, petroleum ether/ethyl acetate from 20:1 to 5:1, v/v) to give the desired product: colorless oil (22.9 mg, 28%), 1H NMR (600 MHz, Chloroform-*d*) δ 7.87 – 7.84 (m, 2H), 7.83 – 7.80 (m, 2H), 7.55 – 7.50 (m, 2H), 7.28 – 7.23 (m, 2H), 4.19 – 4.05 (m, 2H), 3.78 (dd, *J* = 14.4, 4.9 Hz, 1H), 3.65 (dd, *J* = 18.1, 5.6 Hz, 1H), 3.56 (dd, *J* = 18.1, 5.4 Hz, 1H), 3.49 (dd, *J* = 14.4, 7.6 Hz, 1H), 3.44 – 3.38 (m, 1H), 2.42 (s, 3H), 1.20 (t, *J* = 7.1 Hz, 3H). 13C NMR (151 MHz, Chloroform-*d*) δ 196.5, 171.7, 144.6, 140.7, 137.8, 133.6, 129.7, 129.5, 129.4, 128.2, 61.7, 56.0, 38.6, 35.6, 21.7, 14.0. HRMS (ESI-TOF) *m/z*: [M + Na]+ calcd for C20H21ClNaO5S, 431.0690; found, 431.0709.

***6-(p-tolyl)-4,5-dihydropyridazin-3(2H)-one (4)8***

Purified by flash chromatography (silica gel, petroleum ether/ethyl acetate from 20:1 to 5:1, v/v) to give the desired product: white solid (30.1 mg, 80%), 1H NMR (600 MHz, Chloroform-*d*) δ 9.1 (s, 1H), 7.7 – 7.5 (m, 2H), 7.2 – 7.2 (m, 2H), 3.0 (dd, *J* = 8.9, 7.6 Hz, 2H), 2.6 (dd, *J* = 8.9, 7.6 Hz, 2H), 2.4 (s, 3H). 13C NMR (151 MHz, Chloroform-*d*) δ 167.5, 150.7, 140.1, 132.8, 129.3, 125.8, 26.4, 22.6, 21.3.

***5-(p-tolyl)dihydrofuran-2(3H)-one (5)8***

Purified by flash chromatography (silica gel, petroleum ether/ethyl acetate from 30:1 to 10:1, v/v) to give the desired product: colorless oil (31.7 mg, 90%), 1H NMR (600 MHz, Chloroform-*d*) δ 7.25 – 7.17 (m, 4H), 5.52 – 5.43 (m, 1H), 2.69 – 2.58 (m, 3H), 2.36 (s, 3H), 2.25 – 2.12 (m, 1H). 13C NMR (151 MHz, Chloroform-*d*) δ 176.9, 138.3, 136.3, 129.4, 125.3, 81.3, 30.9, 29.0, 21.1.

# NMR copies of product

# References

1 Gao, J., Wang, J.-Q., Song, Q.-W. & He, L.-N. Iron(III)-based ionic liquid-catalyzed regioselective benzylation of arenes and heteroarenes. *Green Chem.* **13**, 1182-1186, (2011).

2 Kore, R. & Srivastava, R. Synthesis and applications of highly efficient, reusable, sulfonic acid group functionalized Brönsted acidic ionic liquid catalysts. *Catal. Commun.* **12**, 1420-1424, (2011).

3 Wang, W. *et al.* Efficient synthesis of isosorbide-based polycarbonate with scalable dicationic ionic liquid catalysts by balancing the reactivity of the endo-OH and exo-OH. *Green Chem.* **23**, 973-982, (2021).

4 Aldroubi, S. *et al.* Ionothermal carbonization of sugarcane bagasse in imidazolium tetrachloroferrate ionic liquids: effect of the cation on textural and morphological properties. *Green Chem.* **25**, 3533-3542, (2023).

5 GODAJDAR, B. M. & KIASAT, A. [PBMIM](FeCl4)2: an effective catalyst for the one-pot synthesis of 1, 3-dihydropyrimidin-2-ones and thiones under solvent free conditions. *Journal of the Chilean Chemical Society* **58**, 1850-1852, (2013).

6 Zhang, M., Xie, J. & Zhu, C. A general deoxygenation approach for synthesis of ketones from aromatic carboxylic acids and alkenes. *Nat. Commun.* **9**, 3517, (2018).

7 Fang, X.-X. *et al.* Visible-Light-Mediated Oxidative Coupling of Vinylarenes with Bromocarboxylates Leading to *γ*-Ketoesters. *J. Org. Chem.* **84**, 15677-15684, (2019).

8 Zhang, Q. *et al.* Photoredox-Catalyzed *α*-C(sp3)–H Activation of Unprotected Secondary Amines: Facile Access to 1,4-Dicarbonyl Compounds. *Org. Lett.* **22**, 7460-7464, (2020).

9 Chen, J.-Q. *et al.* Direct Decarboxylative–Decarbonylative Alkylation of *α*-Oxo Acids with Electrophilic Olefins via Visible-Light Photoredox Catalysis. *J. Org. Chem.* **83**, 253-259, (2018).

10 Khamrai, J., Das, S., Savateev, A., Antonietti, M. & König, B. Mizoroki–Heck type reactions and synthesis of 1,4-dicarbonyl compounds by heterogeneous organic semiconductor photocatalysis. *Green Chem.* **23**, 2017-2024, (2021).
